# Diabetes Care<sup>®</sup>

THE JOURNAL OF CLINICAL AND APPLIED RESEARCH AND EDUCATION

January 2022 Volume 45, Supplement 1

[T]he simple word *Care* may suffice to express [the journal's] philosophical mission. The new journal is designed to promote better patient care by serving the expanded needs of all health professionals committed to the care of patients with diabetes. As such, the American Diabetes Association views *Diabetes Care* as a reaffirmation of Francis Weld Peabody's contention that "the secret of the care of the patient is in caring for the patient."

—Norbert Freinkel, *Diabetes Care*, January-February 1978

## EDITOR IN CHIEF

Matthew C. Riddle, MD

## ASSOCIATE EDITORS

Vanita R. Aroda, MD  
George Bakris, MD  
Lawrence Blonde, MD, FACP  
Andrew J.M. Boulton, MD  
Jessica R. Castle, MD  
Linda A. DiMeglio, MA, MD, MPH  
Linda Gonder-Frederick, PhD  
Frank B. Hu, MD, MPH, PhD  
Steven E. Kahn, MB, ChB  
Sanjay Kaul, MD, FACC, FAHA  
Robert G. Moses, MD  
Stephen S. Rich, PhD  
Julio Rosenstock, MD  
Elizabeth Selvin, PhD, MPH  
Adrian Vella, MD  
Judith Wylie-Rosett, EdD, RD

## EDITORIAL BOARD

Fida Bacha, MD  
Katharine Barnard-Kelly, PhD  
Ananda Basu, MD, FRCP  
Tadej Battelino, MD, PhD  
Petter Bjornstad, MD  
Fiona Bragg, BSc, MBChB, MRCP, MSc, DPhil, FFPH  
John B. Buse, MD, PhD  
Mark Emmanuel Cooper, MB BS, PhD  
Matthew J. Crowley, MD, MHS  
J. Hans DeVries, MD, PhD  
Kimberly A. Driscoll, PhD  
Kathleen M. Dungan, MD, MPH  
Hertzel C. Gerstein, MD, MSc, FRCOC  
Jessica Lee Harding, PhD  
Stewart B. Harris, CM, MD, MPH, FCFP, FACPM  
Byron J. Hoogwerf, MD, FACP, FACE  
Sarah S. Jaser, PhD  
M. Sue Kirkman, MD  
Richard David Graham Leslie, MD, FRCP, FAoP  
John J.V. McMurray, MD, FRCP, FESC, FACC, FAHA, FRSE, FMedSci  
Mark E. Molitch, MD  
Helen R. Murphy, MBBChBAO, FRACP, MD  
Katherine Ogurtsova, PhD  
Bruce A. Perkins, MD, MPH  
Casey M. Rebholz, PhD, MS, MNSP, MPH  
Maria Jose Redondo, MD, PhD, MPH  
Peter Rossing, MD, DMSc  
Desmond Schatz, MD  
Guntram Scherthaner, MD  
Jonathan Shaw, MD, FRCP, FRACP, FAAHMS  
Jay M. Sosenko, MD, MS  
Samy Suissa, PhD  
Giovanni Targher, MD  
Kristina M. Utzschneider, MD  
Daniel H. van Raalte, MD, PhD  
Joseph I. Wolsdorf, MB, BCH  
Daisuke Yabe, MD, PhD  
Sophia Zoungas, MBBS (Hons), PhD, FRACP

## AMERICAN DIABETES ASSOCIATION OFFICERS

|                                                               |                                                                                    |
|---------------------------------------------------------------|------------------------------------------------------------------------------------|
| CHAIR OF THE BOARD<br>John Schlosser                          | PRESIDENT-ELECT, MEDICINE & SCIENCE<br>Guillermo Umpierrez, MD, CDE, FACP, FACE    |
| PRESIDENT, MEDICINE & SCIENCE<br>Ruth Weinstock, MD, PhD      | PRESIDENT-ELECT, HEALTH CARE & EDUCATION<br>Otis Kirksey, PharmD, RPh, CDE, BC-ADM |
| PRESIDENT, HEALTH CARE & EDUCATION<br>Cynthia Muñoz, PhD, MPH | SECRETARY/TREASURER-ELECT<br>Marshall Case                                         |
| SECRETARY/TREASURER<br>Christopher Ralston, JD                | CHIEF SCIENTIFIC & MEDICAL OFFICER<br>Robert A. Gabbay, MD, PhD                    |
| CHAIR OF THE BOARD-ELECT<br>Glen Tullman                      |                                                                                    |

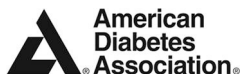

The mission of the American Diabetes Association is to prevent and cure diabetes and to improve the lives of all people affected by diabetes.

# Diabetes Care<sup>®</sup>

THE JOURNAL OF CLINICAL AND APPLIED RESEARCH AND EDUCATION

*Diabetes Care* is a journal for the health care practitioner that is intended to increase knowledge, stimulate research, and promote better management of people with diabetes. To achieve these goals, the journal publishes original research on human studies in the following categories: Clinical Care/Education/Nutrition/Psychosocial Research, Epidemiology/Health Services Research, Emerging Technologies and Therapeutics, Pathophysiology/Complications, and Cardiovascular and Metabolic Risk. The journal also publishes ADA statements, consensus reports, clinically relevant review articles, letters to the editor, and health/medical news or points of view. Topics covered are of interest to clinically oriented physicians, researchers, epidemiologists, psychologists, diabetes educators, and other health professionals. More information about the journal can be found online at [care.diabetesjournals.org](http://care.diabetesjournals.org).

Copyright © 2021 by the American Diabetes Association, Inc. All rights reserved. Printed in the USA. Requests for permission to reuse content should be sent to Copyright Clearance Center at [www.copyright.com](http://www.copyright.com) or 222 Rosewood Dr., Danvers, MA 01923; phone: (978) 750-8400; fax: (978) 646-8600. Requests for permission to translate should be sent to Permissions Editor, American Diabetes Association, at [permissions@diabetes.org](mailto:permissions@diabetes.org).

The American Diabetes Association reserves the right to reject any advertisement for any reason, which need not be disclosed to the party submitting the advertisement.

Commercial reprint orders should be directed to Sheridan Content Services, (800) 635-7181, ext. 8065.

Single issues of *Diabetes Care* can be ordered by calling toll-free (800) 232-3472, 8:30 A.M. to 5:00 P.M. EST, Monday through Friday. Outside the United States, call (703) 549-1500. Rates: \$75 in the United States, \$95 in Canada and Mexico, and \$125 for all other countries.

*Diabetes Care* is available online at [care.diabetesjournals.org](http://care.diabetesjournals.org). Please call the numbers listed above, e-mail [membership@diabetes.org](mailto:membership@diabetes.org), or visit the online journal for more information about submitting manuscripts, publication charges, ordering reprints, subscribing to the journal, becoming an ADA member, advertising, permission to reuse content, and the journal's publication policies.

Periodicals postage paid at Arlington, VA, and additional mailing offices.

PRINT ISSN 0149-5992  
ONLINE ISSN 1935-5548  
PRINTED IN THE USA

---

## AMERICAN DIABETES ASSOCIATION PERSONNEL AND CONTACTS

ASSOCIATE PUBLISHER,  
SCHOLARLY JOURNALS  
Christian S. Kohler

ASSOCIATE DIRECTOR, SCHOLARLY JOURNALS  
Keang Hok

SENIOR MANAGER, BILLING & COLLECTIONS  
Josh Flores  
[jflores@diabetes.org](mailto:jflores@diabetes.org)  
(703) 549-1500, ext. 2110

EDITORIAL OFFICE DIRECTOR  
Lyn Reynolds

TECHNICAL EDITOR  
Theresa M. Cooper

PHARMACEUTICAL & DEVICE PRINT ADVERTISING  
Lisa Morton  
Senior Account Manager  
[lmorton@diabetes.org](mailto:lmorton@diabetes.org)  
(312) 346-1805, ext. 6571

PEER REVIEW MANAGER  
Shannon Potts

PRODUCTION COORDINATOR  
Saleha Malik

DIRECTOR, MEMBERSHIP/SUBSCRIPTION  
SERVICES  
Donald Crowl

PHARMACEUTICAL & DEVICE DIGITAL ADVERTISING  
eHealthcare Solutions  
R.J. Lewis  
President and CEO  
[rlewis@ehsmail.com](mailto:rlewis@ehsmail.com)  
(609) 882-8887, ext. 101

ASSOCIATE MANAGER, PEER REVIEW  
Larissa M. Pouch

SENIOR ADVERTISING MANAGER  
Julie DeVoss Graff  
[jgraff@diabetes.org](mailto:jgraff@diabetes.org)  
(703) 299-5511

DIRECTOR, SCHOLARLY JOURNALS  
Heather Norton Blackburn
